# Supplementary material
Source: PubMed Central journal article supplement (PMC2873786)

Copies of  $^1\text{H-NMR}$  and  $^{13}\text{C-NMR}$  Spectra for:

Pyridine and Pyrimidine Analogs of  
Acetaminophen as Inhibitors of Lipid  
Peroxidation and Cyclooxygenase and  
Lipoxygenase Catalysis

Tae-gyu Nam,<sup>a</sup> Susheel J. Nara,<sup>b</sup> Irène Zagol-Ikapitte,<sup>c</sup> Thomas Cooper,<sup>b</sup> Luca  
Valgimigli,<sup>d</sup> John A. Oates,<sup>c</sup> Ned A. Porter,<sup>a</sup> Olivier Boutaud,<sup>c,\*</sup> & Derek A. Pratt<sup>b,\*</sup>

*Department of Chemistry, Vanderbilt University, Nashville, TN, 37235, USA, Department  
of Chemistry, Queen's University, Kingston, Ontario, K7L 3N6, Canada, Division of  
Clinical Pharmacology, Vanderbilt University School of Medicine, Nashville, TN,  
37232, USA and Dipartimento di Chimica Organica "A. Mangini", Università di  
Bologna, via San Giacomo 11, 40126 Bologna, Italy*

olivier.boutaud@mc.vanderbilt.edu; pratt@chem.queensu.ca

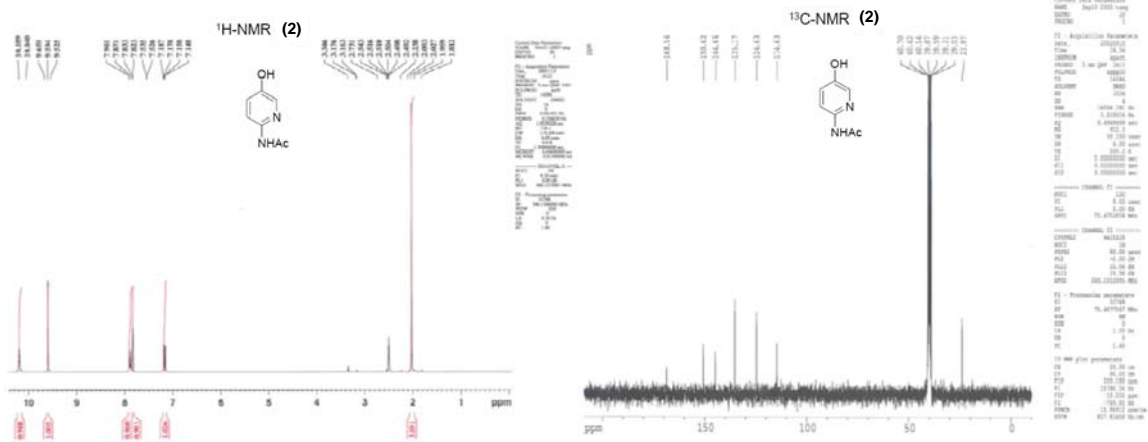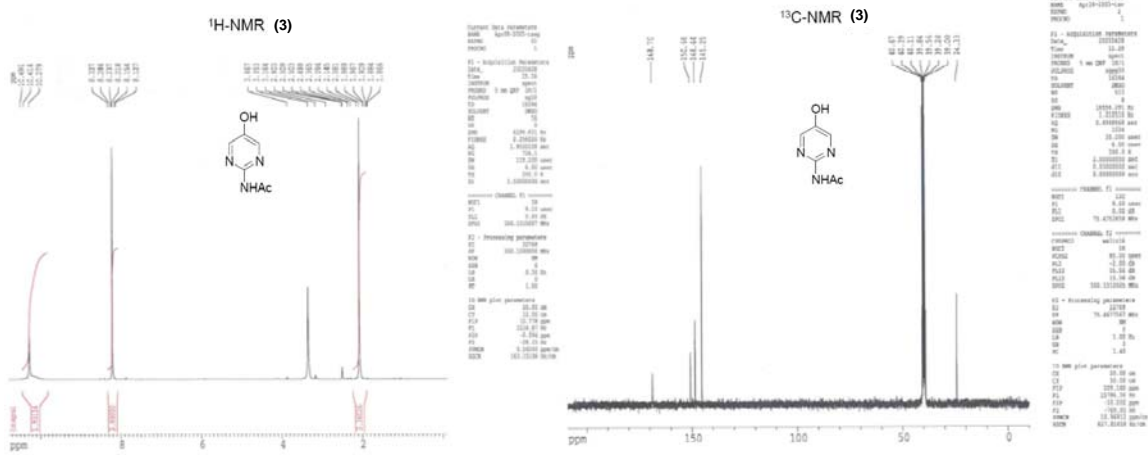

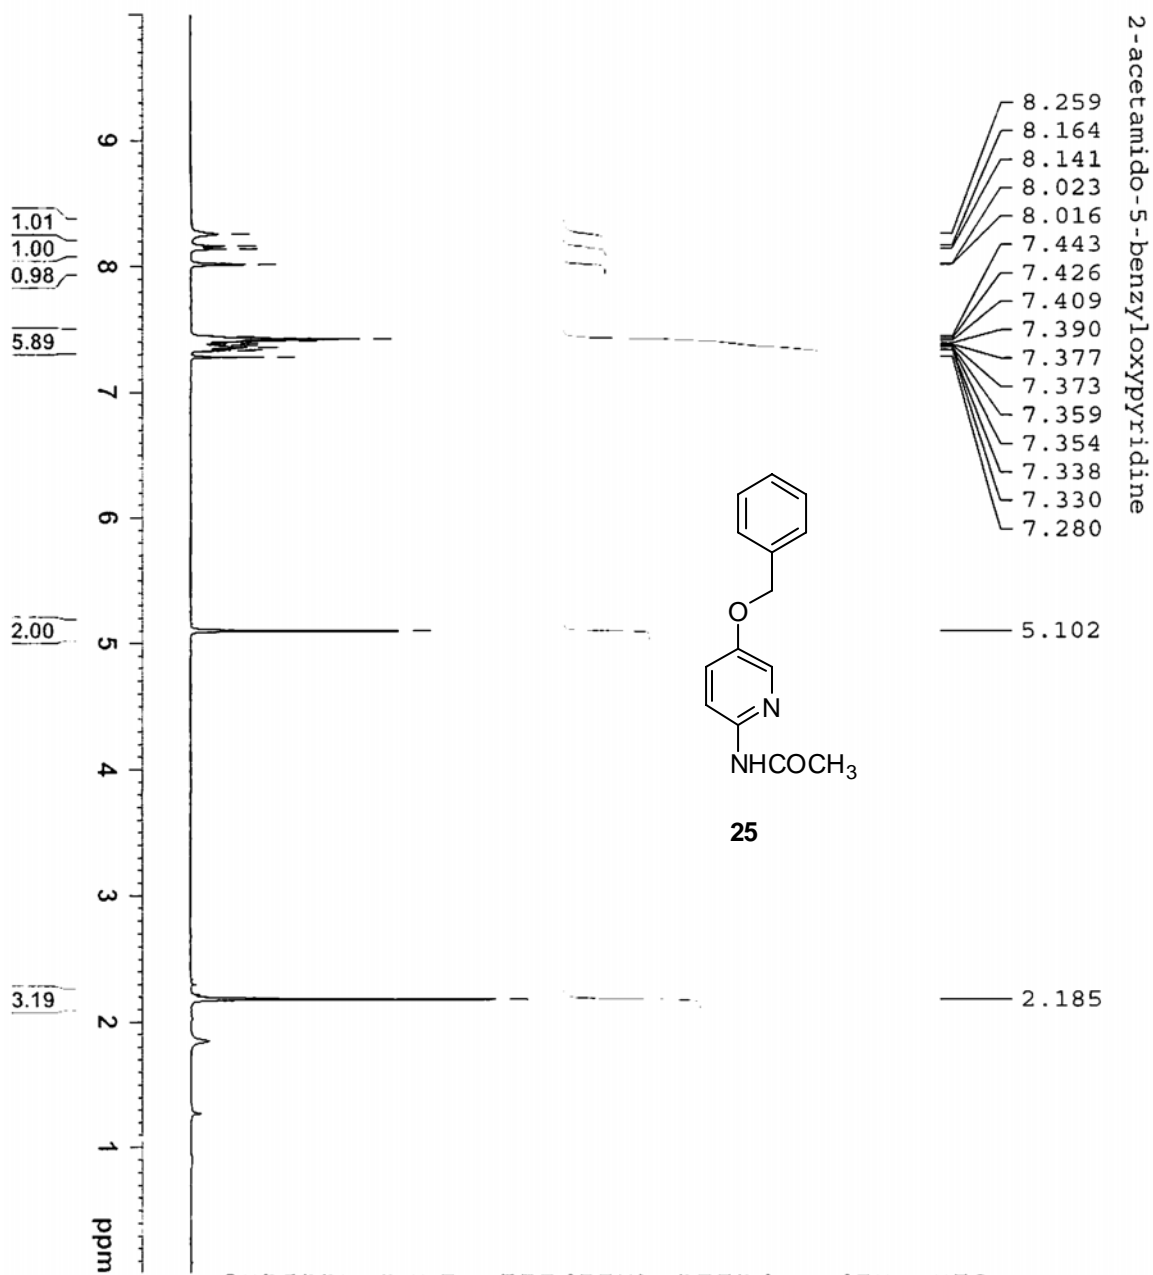

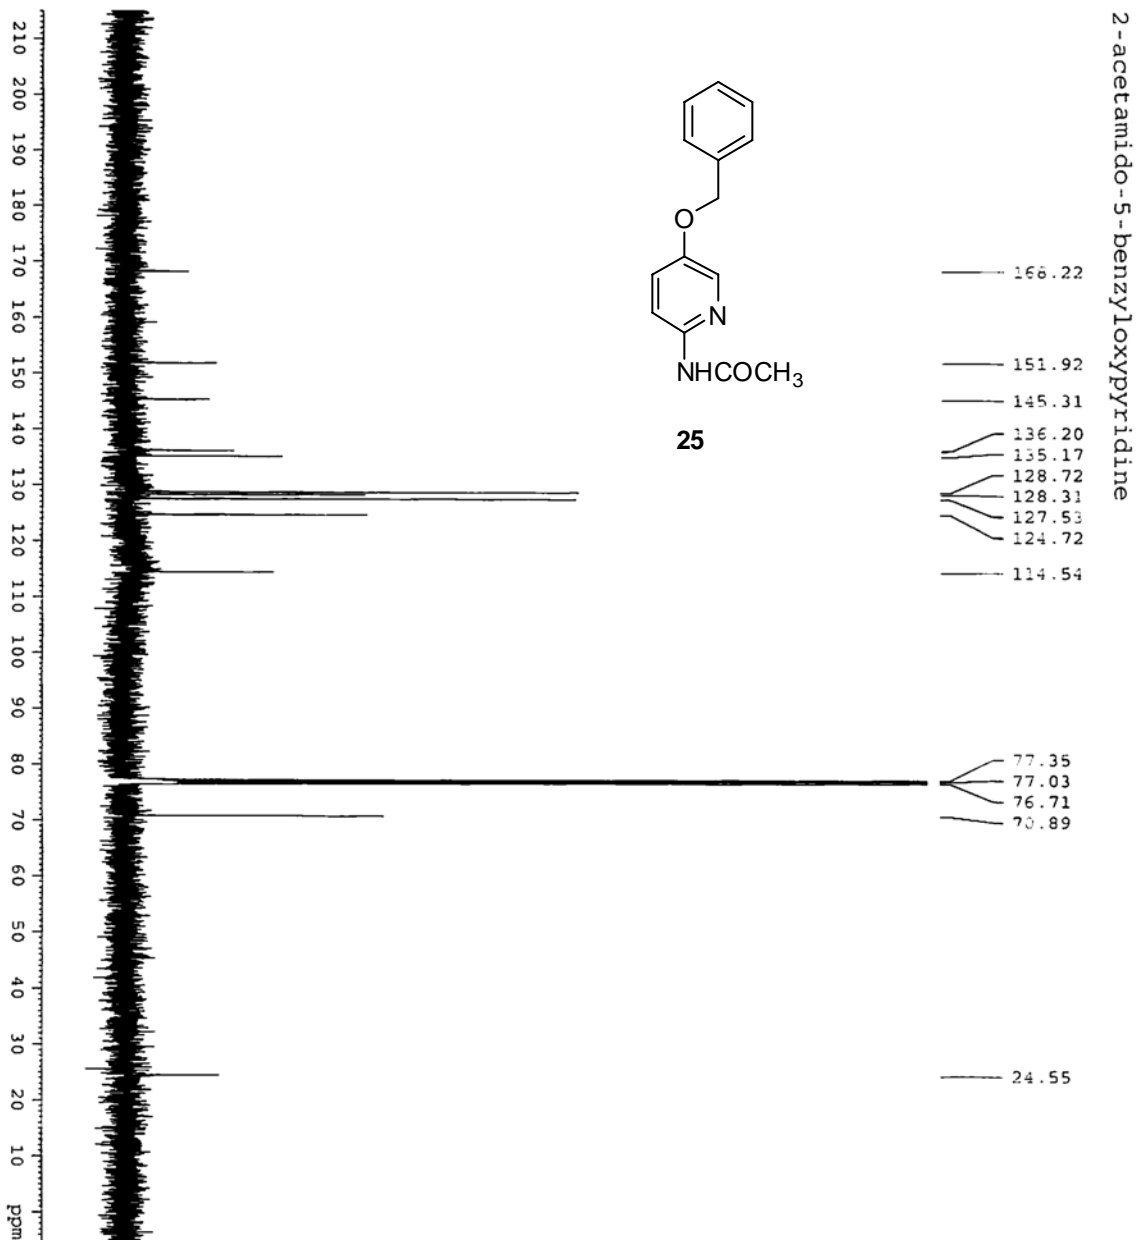

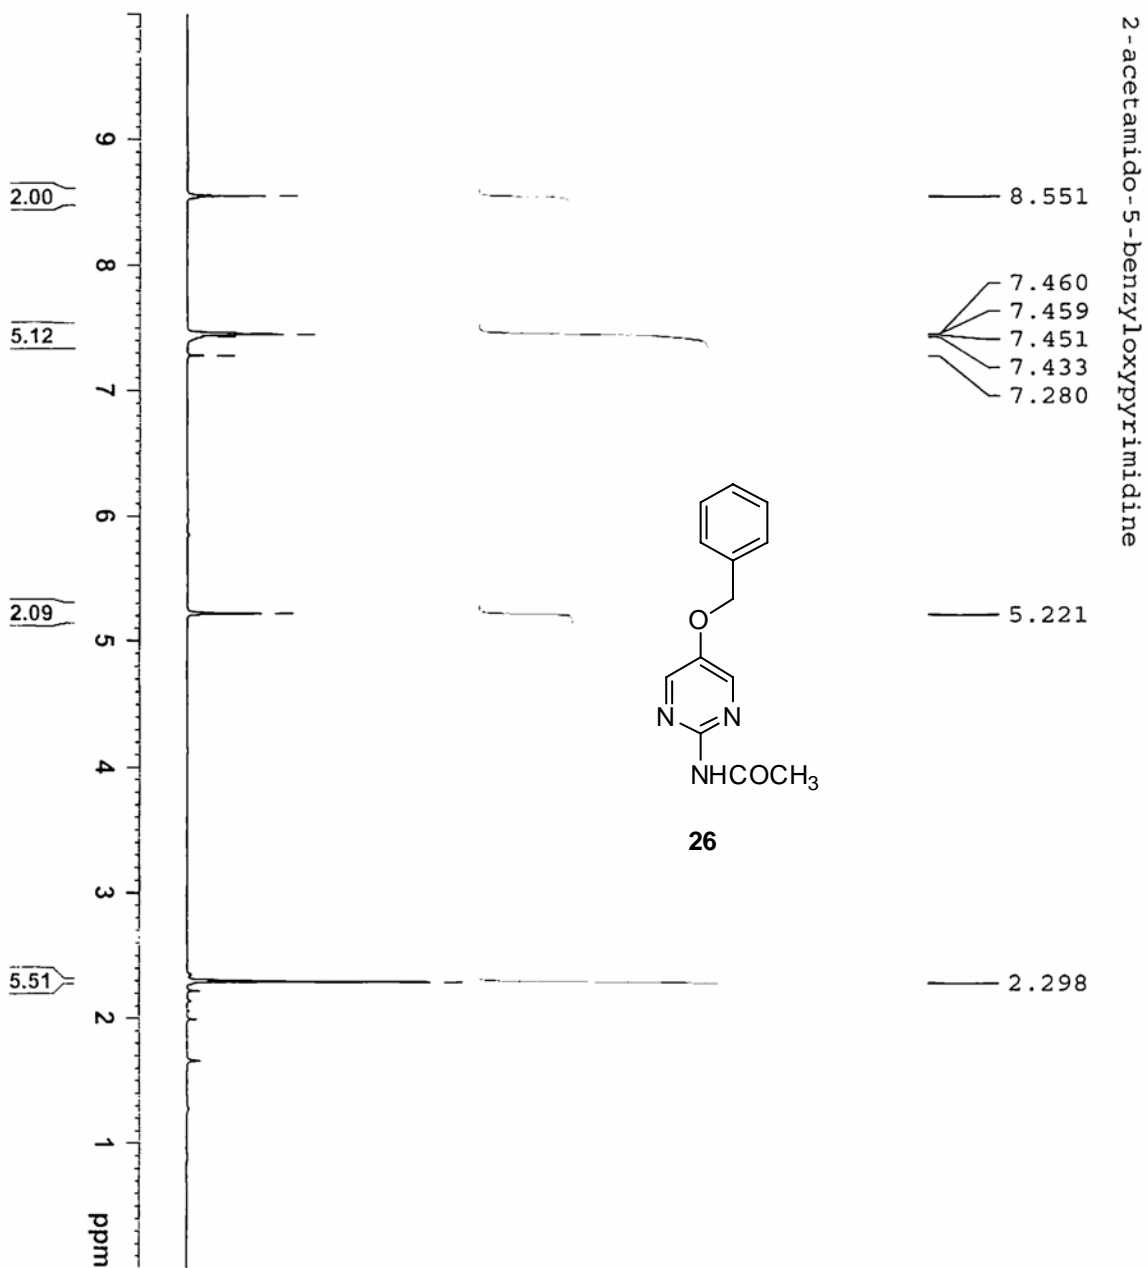

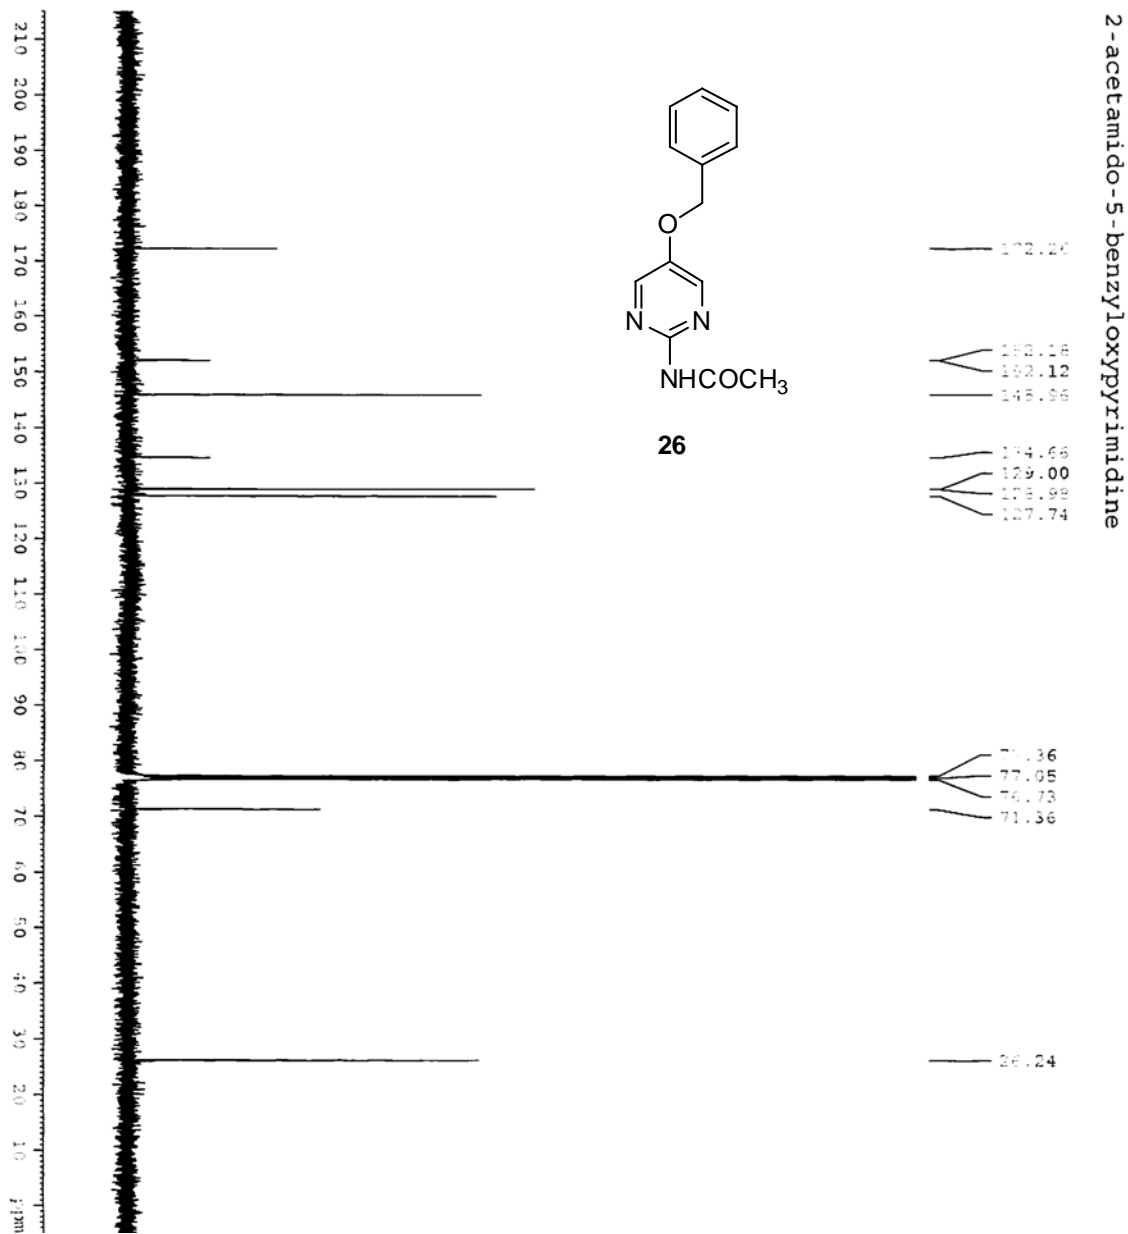

Supplement: NIHMS198282-supplement-b912528_Sup_Info.pdf [file NIHMS198282-supplement-b912528_Sup_Info.pdf]
